# Supplementary material
Source: publisher figshare collection journal article supplement (https://frontiersin.figshare.com/ndownloader/files/13663418)
Supplement: Supplementary file [file 13663418]

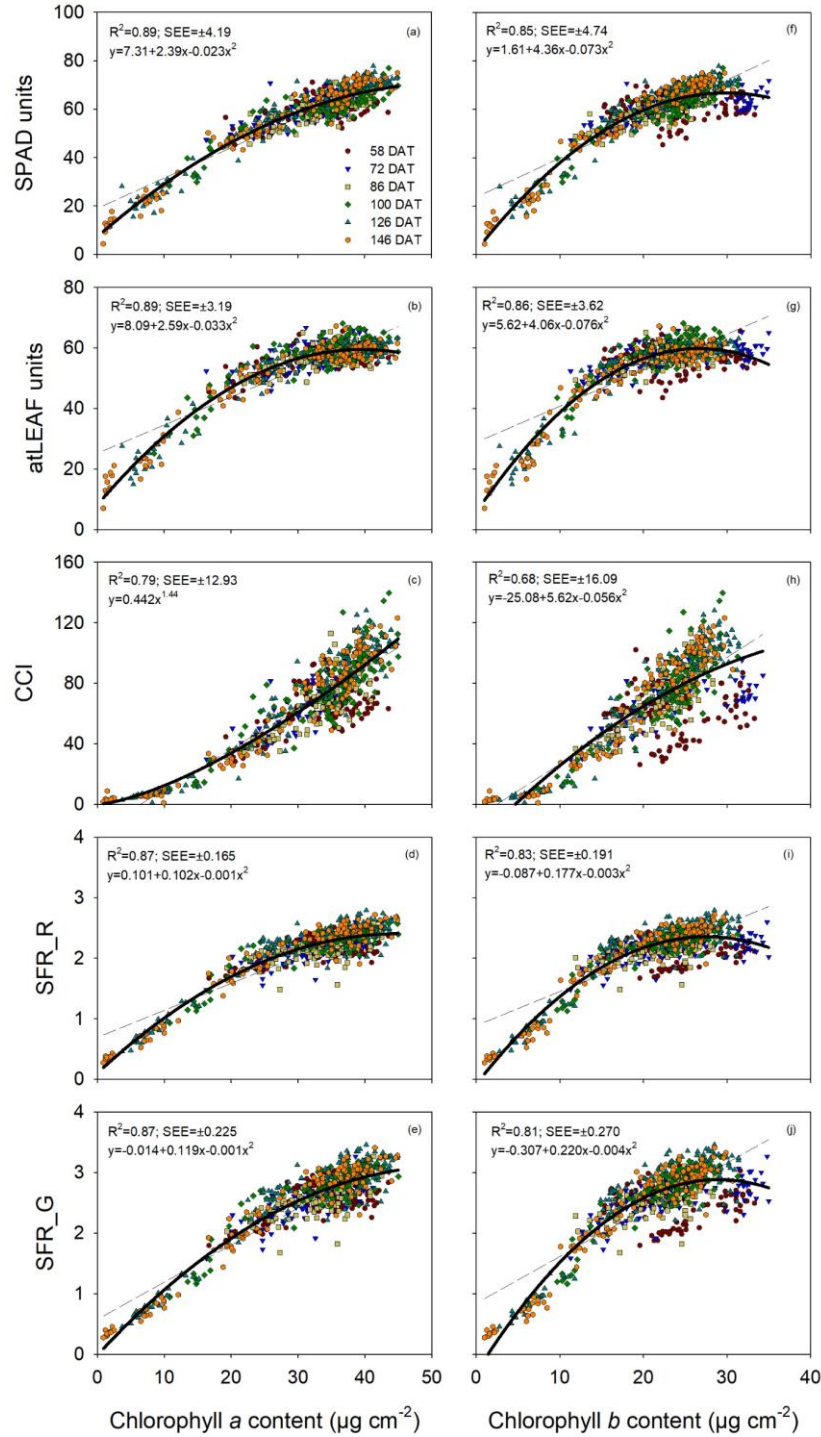

Figure S4. Relationships between chlorophyll *a* and chlorophyll *b* contents ( $\mu\text{g cm}^{-2}$ ) and different chlorophyll meter measurements. Coefficient of determination ( $R^2$ ), standard error of the estimate ( $\pm\text{SEE}$ ) and equation of the regression are shown (solid lines). CCI is chlorophyll content index, measured with the MC-100 meter; SFR is Simple Fluorescence Ratio, either under red (SFR\_R) or green (SFR\_G) excitation, measured with the Multiplex sensor. Dotted lines represent the linear regression.
